# Supplementary material for: How the magnetic field impacts the chiroptical activities of helical copper enantiomers
Source: Royal Society of Chemistry journal article supplement (doi:10.1039/d1nj03803f), 2021-01-01
Supplement: d1nj03803f1.pdf [file d1nj03803f1.pdf]

## **Supporting Information**

### How the Magnetic Field Impacts the Chiroptical Activities of Helical Copper Enantiomers

Jialu Wu<sup>a#</sup>, Bo Li<sup>b#</sup>, Hong Wang<sup>c</sup>, Yingzhen Lai<sup>a</sup>, Yue Ye<sup>a</sup>, Yongkang Zou<sup>a</sup>, Jumei Tian<sup>a\*</sup>, and  
Yaohua Xu<sup>d</sup>

<sup>a</sup> Department of Stomatology of Xiamen Medical College & Engineering Research Center of Fujian University for Stomatological Biomaterials, Xiamen 361023, China.

<sup>b</sup> Hebei Key Laboratory of Hazardous Chemicals Safety and Control Technology, School of Chemical and Environmental Engineering, North China Institute of Science and Technology, Langfang 065201, Hebei, China.

<sup>c</sup> School and Hospital of Stomatology, Fujian Medical University, Fuzhou, Fujian 350000, China.

<sup>d</sup> Beijing Zhongkebaice Technology Service Co., Ltd.

<sup>#</sup> Jialu Wu and Bo Li contributed equally to this work.

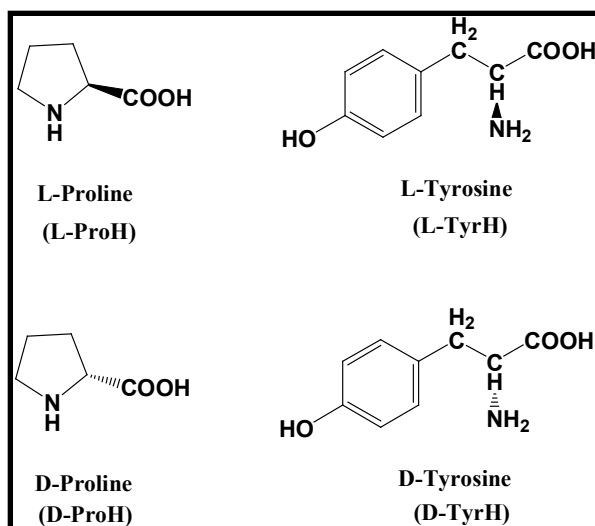

**Scheme S1** the amino acid ligands using in this system.

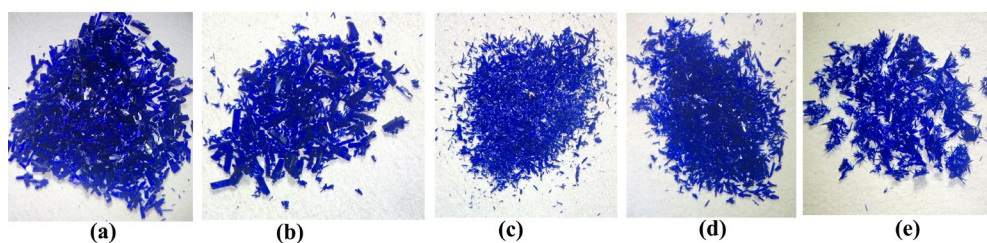

**Fig. S1.** The representational photos of **L-1** with the ratio of  $\text{CuSO}_4 \cdot 5\text{H}_2\text{O}$ : L-tyrH: L-proH: NaOH (a) 1:1:1:4; (b) 1:1:2:4; (c) 1:1:3:8; (d) 1:1:2:6; (e) 3:1:3:8.5 under the microscope.

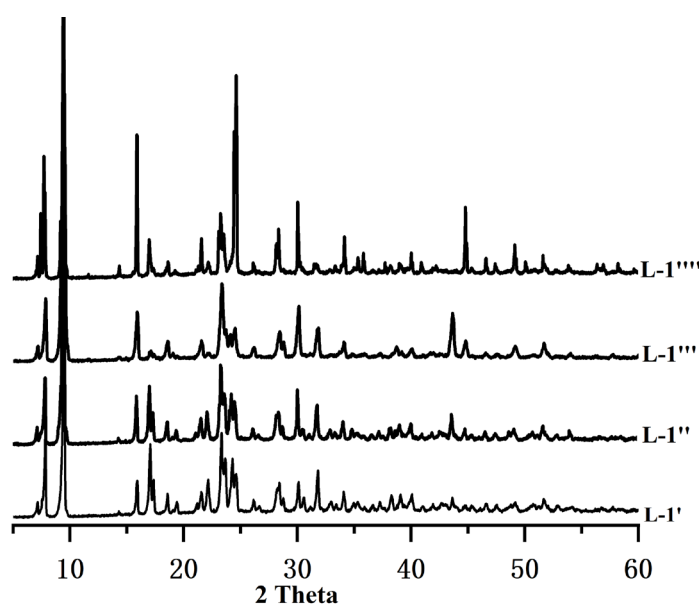

**Fig. S2.** The Powder X-ray diffraction (PXRD) patterns:  
**L-1'**: A mixture of L- tyrH (1 mmol, 0.1816 g) and NaOH (2mmol, 0.0801g) in 30 mL of deionized water, L- proH (1 mmol, 0.1152 g) and NaOH (2mmol, 0.0801g) in 30

mL of deionized water,  $\text{CuSO}_4 \cdot 5\text{H}_2\text{O}$  (1 mmol, 0.2497g) in 30 mL of deionized water was stirred for 45 min, and then was heated at 80 °C for 15min before being stirred further at ambient temperature 15min. Microcrystal not suitable for testing was isolated after several days. The PXRD measurement was recorded as shown in Fig. S2.

**L-1''**: A mixture of L- tyrH (1 mmol, 0.1816 g) and NaOH (1mmol, 0.0401g) in 30 mL of deionized water, L- proH (1 mmol, 0.1152 g) and NaOH (1mmol, 0.0402g) in 30 mL of deionized water,  $\text{CuSO}_4 \cdot 5\text{H}_2\text{O}$  (1 mmol, 0.2497g) and NaOH (2mmol, 0.0802g) in 30 mL of deionized water was stirred for 45min, and then was heated at 80 °C for 15min before being stirred further at ambient temperature 15min. Microcrystal not suitable for testing was isolated after several days. The PXRD measurement was recorded as shown in Fig. S2.

**L-1'''**: A mixture of L- tyrH (1 mmol, 0.1816 g) in 30 mL of deionized water, L- proH (1 mmol, 0.1152 g) in 30 mL of deionized water,  $\text{CuSO}_4 \cdot 5\text{H}_2\text{O}$  (1 mmol, 0.2497g) and NaOH (4mmol, 0.1603g) in 30 mL of deionized water was stirred for 45 min, and then was heated at 80 °C for 15min before being stirred further at ambient temperature 15min. Microcrystal not suitable for testing was isolated after several days. The PXRD measurement was recorded as shown in Fig. S2.

**L-1''''**: A mixture of L- tyrH (1 mmol, 0.1816 g), L- proH (1 mmol, 0.1152 g) and NaOH (4mmol, 0.1602g) in 60 mL of deionized water was stirred for 20 min. Then a deionized water solution (30 mL) of  $\text{CuSO}_4 \cdot 5\text{H}_2\text{O}$  (1 mmol, 0.2497g) was added and the reaction mixture was heated at 80 °C for 15min before being stirred further at ambient temperature 15min. Microcrystal not suitable for testing was isolated after several days. The PXRD measurement was recorded as shown in Fig. S2.

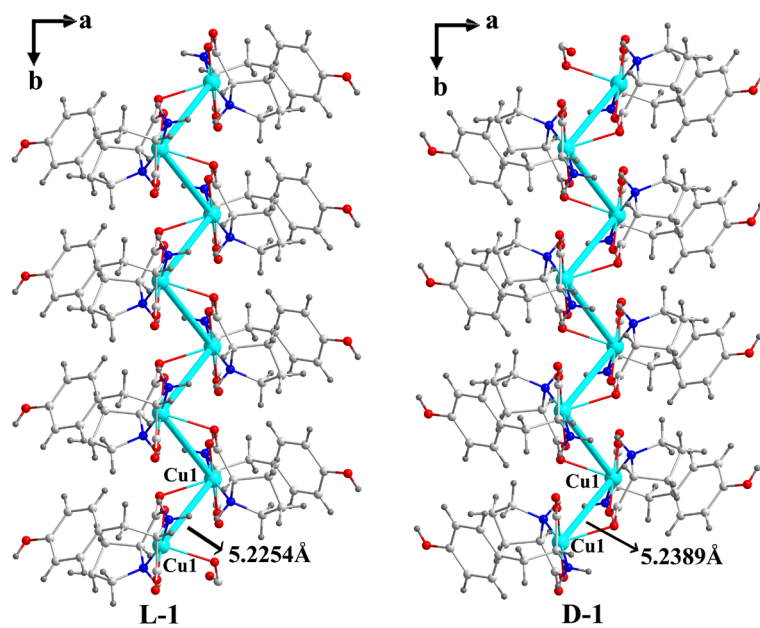

**Fig. S3.** View of the helical chain L-1 (a) and D-1 (b), respectively.

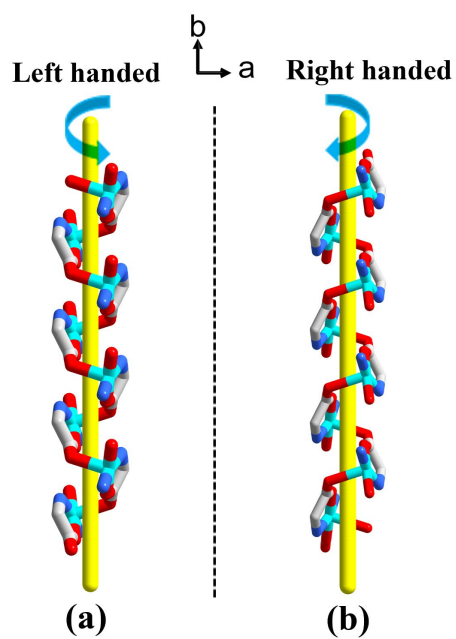

**Fig. S4.** View of the helical chain L-1 (a) and D-1 (b), respectively.

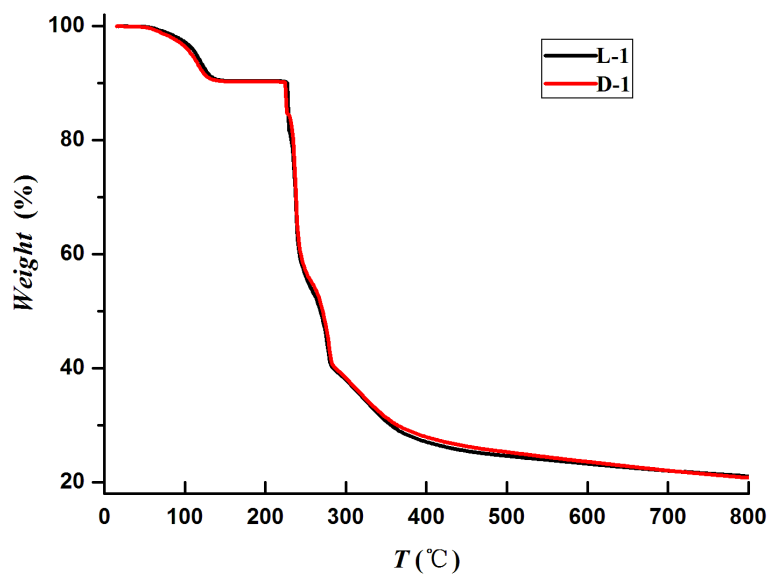

**Fig. S5.** The TGA curves of L-1 (black) and D-1 (red).

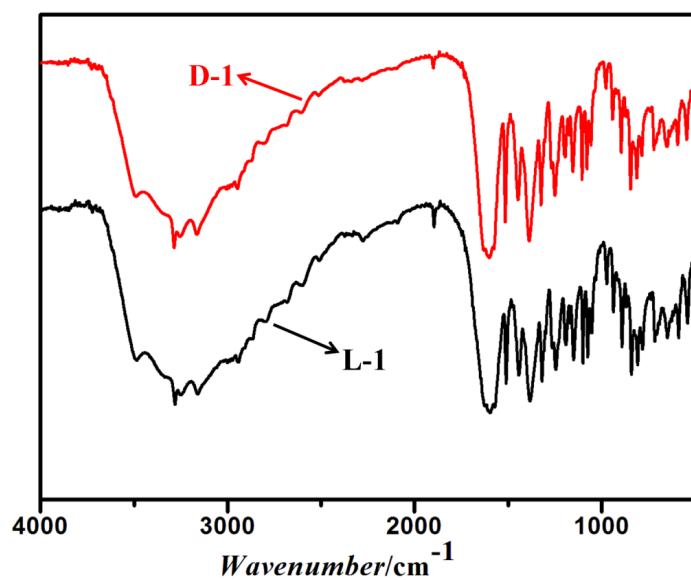

**Fig. S6.** The IR spectrum of L-1 (black) and D-1 (red) in KBr pellets from 4000 cm<sup>-1</sup> to 400 cm<sup>-1</sup>.

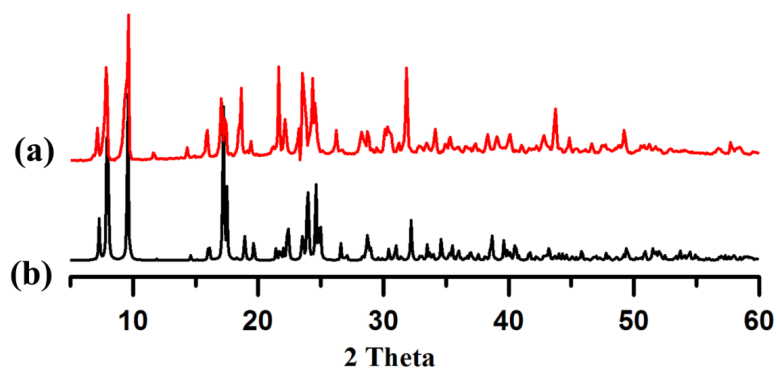

**Fig. S7.** The Powder X-ray diffraction (PXRD) patterns for **L-1**: (a) the experimental pattern at room temperature; (b) the simulated pattern from single crystal X-ray data.

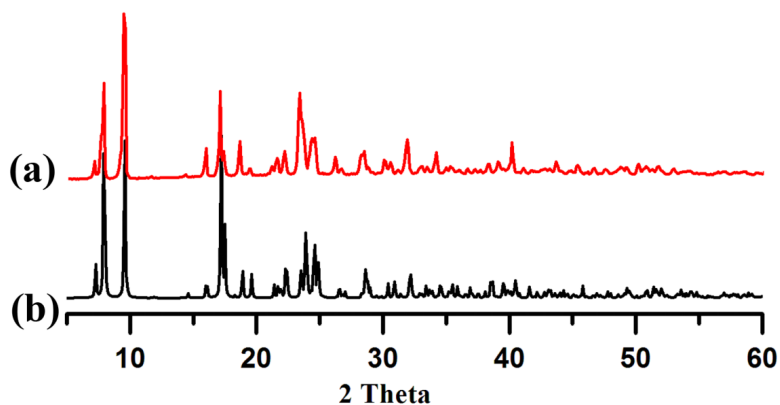

**Fig. S8.** The Powder X-ray diffraction (PXRD) patterns for **D-1**: (a) the experimental pattern at room temperature; (b) the simulated pattern from single crystal X-ray data.

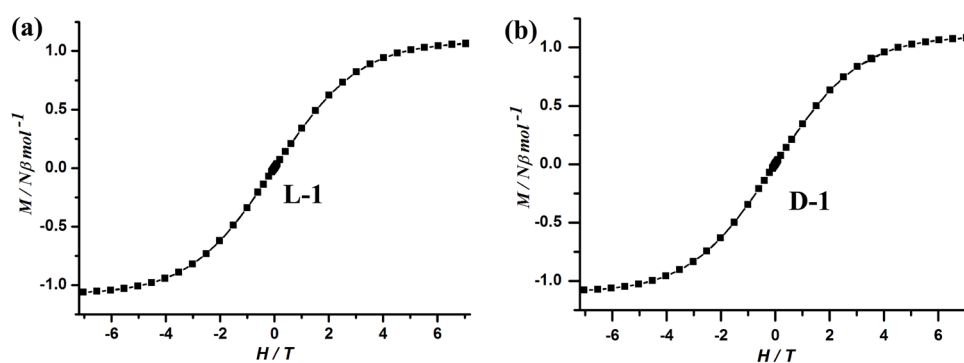

**Fig.S9.** Displaying no magnetic hysteresis loop for **L-1** (a) and **D-1** (b).

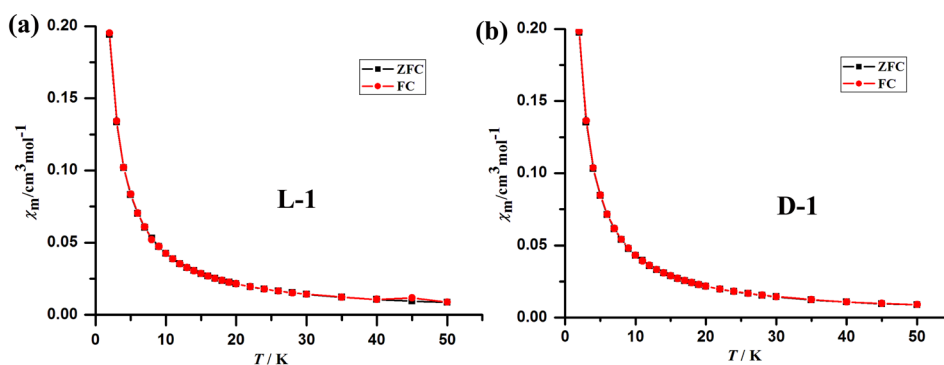

**Fig.S10.** Plots of zero-field-cooled (ZFC) and field-cooled (FC) susceptibilities versus  $T$  at the applied field of 100 Oe for **L-1** (a) and **D-1** (b).

**Table S1.** The crystallographic data for **L-1** and **D-1**.

|                                                                                   | <b>L-1</b>                                                                    | <b>D-1</b>                                                                    |
|-----------------------------------------------------------------------------------|-------------------------------------------------------------------------------|-------------------------------------------------------------------------------|
| CCDC number                                                                       | 2038531                                                                       | 2041015                                                                       |
| <b>formula</b>                                                                    | C <sub>14</sub> H <sub>22</sub> Cu <sub>1</sub> N <sub>2</sub> O <sub>7</sub> | C <sub>14</sub> H <sub>22</sub> Cu <sub>1</sub> N <sub>2</sub> O <sub>7</sub> |
| <b>fw</b>                                                                         | 393.89                                                                        | 393.89                                                                        |
| <b>space group</b>                                                                | P2(1)                                                                         | P2(1)                                                                         |
| <b>crystal system</b>                                                             | Monoclinic                                                                    | Monoclinic                                                                    |
| <i>a</i> /Å                                                                       | 11.3860(2)                                                                    | 11.39160(13)                                                                  |
| <i>b</i> /Å                                                                       | 5.69090(10)                                                                   | 5.69116(6)                                                                    |
| <i>c</i> /Å                                                                       | 12.4062(2)                                                                    | 12.43561(14)                                                                  |
| <i>a</i> /°                                                                       | 90                                                                            | 90                                                                            |
| <i>β</i> /°                                                                       | 102.327(2)                                                                    | 102.1946(11)                                                                  |
| <i>γ</i> /°                                                                       | 90                                                                            | 90                                                                            |
| <i>V</i> /Å <sup>3</sup>                                                          | 785.35(2)                                                                     | 788.026(15)                                                                   |
| <b>Z</b>                                                                          | 2                                                                             | 2                                                                             |
| <b>calculated density (g.cm<sup>-3</sup>)</b>                                     | 1.666                                                                         | 1.660                                                                         |
| <b>absorption coefficient (μ,mm<sup>-1</sup>)</b>                                 | 2.347                                                                         | 2.339                                                                         |
| <b>F(000)</b>                                                                     | 410                                                                           | 410                                                                           |
| <b>crystal size (mm)</b>                                                          | 0.6 x 0.4 x 0.35                                                              | 0.4 x 0.12 x 0.1                                                              |
| <b>θ range (deg)</b>                                                              | 3.647 to 71.523                                                               | 3.636 to 74.311                                                               |
| <b>unique reflns (<i>R</i><sub>int</sub>)</b>                                     | 3047 (0.0519)                                                                 | 3195(0.0361)                                                                  |
| <b><i>RI</i>,<sup>a</sup> <i>wR2</i><sup>b</sup> (<i>I</i> &gt; 2σ(<i>I</i>))</b> | 0.0227, 0.0587                                                                | 0.0214, 0.0561                                                                |
| <b><i>RI</i>,<sup>a</sup> <i>wR2</i><sup>b</sup> (all data)</b>                   | 0.0229, 0.0591                                                                | 0.0215, 0.0561                                                                |
| <b>GOF on <i>F</i><sup>2</sup></b>                                                | 1.041                                                                         | 1.021                                                                         |

$${}^a R = \sum \| |F_o| - |F_c| \| / \sum |F_c|, {}^b wR_2 = \left[ \sum w(|F_o| - |F_c|)^2 / \sum w(F_o^2) \right]^{1/2}, w = 1 / \sigma(F_o)^2.$$

**Table S2.** Selected bond lengths (Å) and angles (deg) for **L-1**.

| Bond lengths [Å] |            |                 |            |
|------------------|------------|-----------------|------------|
| Cu(1)-O(1)       | 1.954(2)   | Cu(1)-O(3)      | 1.949(2)   |
| Cu(1)-N(2)       | 1.976(2)   | Cu(1)-N(1)      | 2.001(2)   |
| C(1)-N(1)        | 1.505(4)   | C(1)-C(2)       | 1.524(4)   |
| C(2)-C(3)        | 1.525(5)   | C(3)-C(4)       | 1.544(3)   |
| C(4)-N(1)        | 1.497(4)   | C(4)-C(5)       | 1.518(4)   |
| C(5)-O(2)        | 1.250(4)   | C(5)-O(1)       | 1.281(3)   |
| C(6)-N(2)        | 1.484(4)   | C(6)-C(7)       | 1.523(4)   |
| C(6)-C(8)        | 1.538(4)   | C(7)-O(4)       | 1.240(4)   |
| C(7)-O(3)        | 1.288(3)   | C(8)-C(9)       | 1.513(4)   |
| C(9)-C(14)       | 1.394(4)   | C(9)-C(10)      | 1.397(4)   |
| C(11)-C(12)      | 1.388(4)   | C(12)-O(5)      | 1.376(3)   |
| C(12)-C(13)      | 1.386(4)   | C(13)-C(14)     | 1.393(4)   |
| Angles [deg]     |            |                 |            |
| O(3)-Cu(1)-O(1)  | 178.33(9)  | N(2)-Cu(1)-N(1) | 167.17(10) |
| O(3)-Cu(1)-N(2)  | 84.89(9)   | C(4)-N(1)-Cu(1) | 109.59(18) |
| O(1)-Cu(1)-N(2)  | 94.16(9)   | C(1)-N(1)-Cu(1) | 112.40(16) |
| O(3)-Cu(1)-N(1)  | 95.53(9)   | C(6)-N(2)-Cu(1) | 108.92(17) |
| O(1)-Cu(1)-N(1)  | 85.09(9)   | C(5)-O(1)-Cu(1) | 115.69(18) |
| C(7)-O(3)-Cu(1)  | 114.30(19) | O(4)-C(7)-O(3)  | 123.2(3)   |
| O(4)-C(7)-C(6)   | 119.2(3)   | O(3)-C(7)-C(6)  | 117.5(3)   |

**Table S3.** Selected bond lengths (Å) and angles (deg) for **D-1**.

| Bond lengths [Å] |            |                 |            |
|------------------|------------|-----------------|------------|
| Cu(1)-O(1)       | 1.9549(19) | Cu(1)-N(1)      | 2.002(2)   |
| Cu(1)-O(3)       | 1.949(2)   | C(1)-N(1)       | 1.503(3)   |
| Cu(1)-N(2)       | 1.978(2)   | C(1)-C(2)       | 1.520(4)   |
| C(2)-C(3)        | 1.523(4)   | C(3)-C(4)       | 1.542(3)   |
| C(4)-N(1)        | 1.498(3)   | C(4)-C(5)       | 1.521(4)   |
| C(5)-O(2)        | 1.246(3)   | C(5)-O(1)       | 1.279(3)   |
| C(6)-N(2)        | 1.484(3)   | C(6)-C(7)       | 1.525(4)   |
| C(6)-C(8)        | 1.535(4)   | C(7)-O(4)       | 1.238(3)   |
| C(7)-O(3)        | 1.283(3)   | C(8)-C(9)       | 1.515(4)   |
| C(9)-C(14)       | 1.391(4)   | C(9)-C(10)      | 1.394(4)   |
| C(11)-C(12)      | 1.386(4)   | C(12)-O(5)      | 1.374(3)   |
| C(12)-C(13)      | 1.382(4)   | C(13)-C(14)     | 1.397(4)   |
| Angles [deg]     |            |                 |            |
| O(3)-Cu(1)-O(1)  | 178.45(9)  | N(2)-Cu(1)-N(1) | 167.23(9)  |
| O(3)-Cu(1)-N(2)  | 84.86(9)   | C(4)-N(1)-Cu(1) | 109.42(17) |
| O(1)-Cu(1)-N(2)  | 94.18(9)   | C(1)-N(1)-Cu(1) | 112.53(15) |
| O(3)-Cu(1)-N(1)  | 95.43(9)   | C(6)-N(2)-Cu(1) | 108.90(16) |



|                 |            |                 |            |
|-----------------|------------|-----------------|------------|
| O(1)-Cu(1)-N(1) | 85.23(8)   | C(5)-O(1)-Cu(1) | 115.62(17) |
| C(7)-O(3)-Cu(1) | 114.30(19) | O(4)-C(7)-O(3)  | 123.3(3)   |
| O(4)-C(7)-C(6)  | 119.2(3)   | O(3)-C(7)-C(6)  | 117.7(2)   |

**Table S4.** the different ratio of CuSO<sub>4</sub>·5H<sub>2</sub>O: L-tyrH: L-proH: NaOH for the reaction systems of **L-1**.

|    | CuSO <sub>4</sub> ·5H <sub>2</sub> O | L-tyrH  | L-proH | NaOH    | The results     |
|----|--------------------------------------|---------|--------|---------|-----------------|
| 1  | 1mmol                                | 1mmol   | 1mmol  | 2mmol   | No product      |
| 2  | 1mmol                                | 1mmol   | 1mmol  | 4mmol   | single-crystal* |
| 3  | 1mmol                                | 1mmol   | 2mmol  | 4mmol   | single-crystal  |
| 4  | 1mmol                                | 1mmol   | 3mmol  | 8mmol   | single-crystal  |
| 5  | 1mmol                                | 1mmol   | 2mmol  | 6mmol   | single-crystal  |
| 6  | 1mmol                                | 2mmol   | 1mmol  | 6mmol   | single-crystal  |
| 7  | 3mmol                                | 1mmol   | 3mmol  | 8.5mmol | single-crystal  |
| 8  | 2mmol                                | 1mmol   | 4mmol  | 10mmol  | single-crystal  |
| 9  | 3mmol                                | 1mmol   | 4mmol  | 10mmol  | single-crystal  |
| 10 | 3mmol                                | 0.5mmol | 4mmol  | 10mmol  | single-crystal  |
| 11 | 3mmol                                | 1.5mmol | 4mmol  | 10mmol  | single-crystal  |
| 12 | 3.5mmol                              | 1mmol   | 4mmol  | 10mmol  | single-crystal  |
| 13 | 4mmol                                | 1mmol   | 4mmol  | 10mmol  | single-crystal  |

\*The highest yield and best suitable for single-crystal X-ray crystallography.
